# Supplementary material for: Global inventory of doubly substituted isotopologues of methane (Δ 13 CH 3 D and Δ 12 CH 2 D 2 )
Source: Copernicus journal article supplement (doi:10.5194/essd-2025-41), 2025-06-18
Supplement: Supplementary file 1 [file essd-2025-41-supplement.zip]

## Sheet: S1 Thermodynamic Equilibrium
Table S1 Temperature dependancy equations from literature review
REFERENCE	DOI	ISOTOPOLOGUES	TEMPERATURE DEPENDANCY EQUATION	COMMENT
Eldridge et al. 2019	10.1021/acsearthspacechem.9b00244	Δ13CH3D	Δ ≈ 1000*ln(K_13CH3D) = 1.47348*10^19/T7 - 2.08648*10^17/T6 + 1.19810*10^15/T^5 - 3.54757*10^12/T^4 + 5.54476*10^9/T^3 - 3.49294*10^6/T^2 + 8.89370*10^2/T
Eldridge et al. 2019	10.1021/acsearthspacechem.9b00244	Δ12CH2D2	Δ ≈ 1000*ln(8/3*K_12CH2D2) = -9.67634*10^15/T^6 + 1.71917*10^14/T^5 - 1.24819*10^12/T^4 + 4.30283*10^9/T^3 - 4.48660*10^6/T^2 + 1.86258*10^3/T
Giunta et al. 2019	10.1016/j.gca.2018.10.030	Δ13CH3D	Δ ≈ 1000ln(1+0.0355502/T-433.038/T^2+1270210.0/T^3-5.94804*10^8/T^4+1.196630*10^11/T^5-9.0723*10^12/T^6)	from Young et al 2016, 2017
Giunta et al. 2019	10.1016/j.gca.2018.10.030	Δ12CH2D2	Δ ≈ 1000ln(1+ 0.183798/T-785.483/T^2+1056280.0/T^3+9.37307*10^7/T^4-8.919480*10^10/T^5+9.901730*10^12/T^6)	from Young et al 2016, 2017
Gruen et al. 2018	10.1016/j.gca.2018.06.029	Δ13CH3D	Δ=-0.1101(1000/T)^3+1.0415(1000/T)^2-0.5223(1000/T)
Liu and Liu. 2015	10.1016/j.gca.2015.11.040	Δ13CH3D	Δ= 0.00255*(1000/T)^4-0.11639*(1000/T)^3+1.01364*(1000/T)^2-0.43627*(1000/T)
Liu and Liu. 2015	10.1016/j.gca.2015.11.040	Δ13CH3D	Δ=-0.00936*(1000/T)^4+0.08341*(1000/T)^3-0.24803*(1000/T)+0.26011*(1000/T)
Stolper et al. 2014	10.1016/j.gca.2013.10.045	Δ18	Δ=-0.0117(10^6/T^2)+0.708(10^6/T^2)-3.318
Thiagarajan et al. 2020	10.1016/j.gca.2020.02.016	Δ18	Δ=-0.0117(10^6/T^2)+0.708(10^6/T^2)-0.337
Douglas et al. 2017	10.1016/j.orggeochem.2017.07.016	Δ13CH3D	Δ=-0.0141(10^6/T^2)+0.699(10^6/T^2)-0.311	from Web and Miller III (2014)
Young et al. 2017	10.1016/j.gca.2016.12.041	Δ13CH3D	Δ ≈ 1000*ln(1+0.0355502/T-433.038/T^2+1270210.0/T^3-5.94804*10^8/T^4+1.196630*10^11/T^5-9.0723*10^12/T^6)
Young et al. 2017	10.1016/j.gca.2016.12.041	Δ12CH2D2	Δ ≈ 1000*ln(1+ 0.183798/T-785.483/T^2+1056280.0/T^3+9.37307*10^7/T^4-8.919480*10^10/T^5+9.901730*10^12/T^6)
Beaudry et al. 2021	10.1016/j.gca.2021.06.034	Δ13CH3D	Δ=_x0002_-0.11006*(1000/T)^3+1.04151*(1000/T)^2-0.55235*(1000/T)
Zhang et al. 2021	10.1016/j.gca.2021.08.027	Δ13CH3D	Δ = 1000*ln(1+ 0.035502/T - 433.038/T^2 + 1270210/T^3- 5.94804*10^8/T^4 + 1.196630*10^11/T^5 -9.0723*10^12/T^6)
Zhang et al. 2021	10.1016/j.gca.2021.08.027	Δ12CH2D2	Δ = 1000*ln(1+ 0.183798/T - 785.483/T^2 + 1056280/T^3 + 9.37307*10^7/T^4 - 8.919480*10^10/T^5 + 9.901730*10^12/T^6)
There are different theoretical expressions on the relations between methane clumped isotopologues composition and temperature, but discrepancies among them are within current analytical uncertainties (e.g., Webb and Miller, 2014; Liu and Liu, 2016; Young et al., 2017; Eldridge et al., 2019; Gropp et al., 2021).

## Sheet: S2 Clumped Isotpologues Sinks
Table S2 KIE values from literature review
REFERENCE	DOI	SINK	ISOTOPOLOGUES	KIE	KIE_UNCERTAINTY	GAMMA	GAMMA_UNCERTAINTY	COMMENT
Gola et al. 2005		OH	13CH4	1.0039 to 1.0059	NA	NA	NA	experimental value, cited in Haghnegahdar et al. 2017
Gola et al. 2005		OH	12CH3D	1.3	NA	NA	NA	experimental value, cited in Haghnegahdar et al. 2017
Joelsson et al. 2014		OH	13CH3D	NA	NA	0.98	0.038	cited in Wang et al. 2016
Joelsson et al. 2016		OH	12CH3D	1.25	NA	NA	NA	experimental value, cited in Haghnegahdar et al. 2017
Joelsson et al. 2016		OH	13CH3D	1.34	NA	NA	NA	experimental value, cited in Haghnegahdar et al. 2017
Gierczak et al. 1997		OH	12CH2D2	1.81	NA	NA	NA	experimental value, cited in Haghnegahdar et al. 2017
Cantrell et al. 1990		OH	13CH4	1.0039 to 1.0059	NA	NA	NA	calcualted value, cited in Haghnegahdar et al. 2017
Gola et al. 2005		OH	12CH3D	1.26	NA	NA	NA	calcualted value, cited in Haghnegahdar et al. 2017
Gola et al. 2005		OH	12CH3D	1.4	NA	NA	NA	calcualted value, cited in Haghnegahdar et al. 2017
Joelsson et al. 2016		OH	13CH3D	1.35	NA	NA	NA	calcualted value, cited in Haghnegahdar et al. 2017
Feilberg et al. 2005		Cl	13CH4	1.058	NA	NA	NA	experimental value, cited in Haghnegahdar et al. 2017
Feilberg et al. 2005		Cl	12CH3D	1.46	NA	NA	NA	experimental value, cited in Haghnegahdar et al. 2017
Joelsson et al. 2014		Cl	13CH3D	1.6	NA	NA	NA	experimental value, cited in Haghnegahdar et al. 2017
Sauer et al. 2015		Cl	12CH2D2	1.40 to 2.43	NA	NA	NA	experimental value, cited in Haghnegahdar et al. 2017
Feilberg et al. 2005		Cl	13CH4	1.021 to 1.066	NA	NA	NA	calcualted value, cited in Haghnegahdar et al. 2017
Feilberg et al. 2005		Cl	12CH3D	1.43 to 1.51	NA	NA	NA	calcualted value, cited in Haghnegahdar et al. 2017
Joelsson et al. 2014		Cl	13CH3D	1.48	NA	NA	NA	calcualted value, cited in Haghnegahdar et al. 2017
Joelsson et al. 2015		Cl	13CH3D	NA	NA	0.978	0.051	cited in Wang et al. 2016
Feilberg et al. 2005		Cl	12CH2D2	2.16 to 2.93	NA	NA	NA	calcualted value, cited in Haghnegahdar et al. 2017
Haghnegahdar et al. 2017	10.1002/2017GB005655	OH	13CH4	1.0063	NA	NA	NA	NA
Haghnegahdar et al. 2017	10.1002/2017GB005655	OH	12CH3D	1.32	NA	NA	NA	NA
Haghnegahdar et al. 2017	10.1002/2017GB005655	OH	13CH3D	1.33	NA	NA	NA	NA
Haghnegahdar et al. 2017	10.1002/2017GB005655	OH	12CH2D2	1.92	NA	NA	NA	NA
Haghnegahdar et al. 2017	10.1002/2017GB005655	Cl	13CH4	1.028	NA	NA	NA	NA
Haghnegahdar et al. 2017	10.1002/2017GB005655	Cl	12CH3D	1.41	NA	NA	NA	NA
Haghnegahdar et al. 2017	10.1002/2017GB005655	Cl	13CH3D	1.46	NA	NA	NA	NA
Haghnegahdar et al. 2017	10.1002/2017GB005655	Cl	12CH2D2	2.2	NA	NA	NA	NA
Whiethill et al. 2017	10.1016/j.gca.2016.09.012	OH	13CH4	1.006	NA	NA	NA	calculated (TST)
Whiethill et al. 2017	10.1016/j.gca.2016.09.012	OH	12CH3D	1.3208	NA	NA	NA	calculated (TST)
Whiethill et al. 2017	10.1016/j.gca.2016.09.012	OH	13CH3D	1.3292	NA	0.9997	NA	calculated (TST)
Whiethill et al. 2017	10.1016/j.gca.2016.09.012	OH	12CH2D2	1.9066	NA	0.9266	NA	calculated (TST)
Whiethill et al. 2017	10.1016/j.gca.2016.09.012	OH	13CH4	1.0061	0.0012	NA	NA	measured
Whiethill et al. 2017	10.1016/j.gca.2016.09.012	OH	12CH3D	1.3344	0.0182	NA	NA	measured
Whiethill et al. 2017	10.1016/j.gca.2016.09.012	OH	13CH3D	1.3429	0.0192	0.9997	0.0012	measured
Whiethill et al. 2017	10.1016/j.gca.2016.09.012	Cl	13CH4	1.028	NA	NA	NA	calculated (TST)
Whiethill et al. 2017	10.1016/j.gca.2016.09.012	Cl	12CH3D	1410	NA	NA	NA	calculated (TST)
Whiethill et al. 2017	10.1016/j.gca.2016.09.012	Cl	13CH3D	1.45	NA	0.996	NA	calculated (TST)
Whiethill et al. 2017	10.1016/j.gca.2016.09.012	Cl	12CH2D2	2.184	NA	0.9633	NA	calculated (TST)
Whiethill et al. 2017	10.1016/j.gca.2016.09.012	Cl	13CH4	1.0621	0.0001	NA	NA	measured
Whiethill et al. 2017	10.1016/j.gca.2016.09.012	Cl	12CH3D	1.482	0.009	NA	NA	measured
Whiethill et al. 2017	10.1016/j.gca.2016.09.012	Cl	13CH3D	1.579	0.011	0.9965	0.0007	measured
Ono et al. 2021	10.1016/j.gca.2020.10.015	AOM	13CH3D	NA	NA	0.9872	0.001	experimental C data from Guaymas incubations
Ono et al. 2021	10.1016/j.gca.2020.10.015	AOM	13CH3D	NA	NA	0.9916	0.0004	experimental B data from Guaymas incubations
Ono et al. 2021	10.1016/j.gca.2020.10.015	AOM	13CH3D	NA	NA	0.9947	0.0003	experimental D data from Guaymas incubations
Ono et al. 2021	10.1016/j.gca.2020.10.015	AOM	13CH3D	NA	NA	0.9952	0.0009	experimental N data from Guaymas incubations
Liu et al. 2023	10.1016/j.gca.2023.02.022	AOM	13CH3D	NA	NA	0.985	0.002	experimental 1 data from Svalbard incubations
Liu et al. 2023	10.1016/j.gca.2023.02.022	AOM	12CH2D2	NA	NA	0.912	0.006	experimental 1 data from Svalbard incubations
Liu et al. 2023	10.1016/j.gca.2023.02.022	AOM	13CH3D	NA	NA	0.985	0.002	experimental 2 data from Svalbard incubations
Liu et al. 2023	10.1016/j.gca.2023.02.022	AOM	12CH2D2	NA	NA	0.909	0.005	experimental 2 data from Svalbard incubations
Wang et al. 2016	10.1016/j.gca.2016.07.031	AeOM	13CH3D	NA	NA	1.0005	0.0003	experiment 30 C
Wang et al. 2016	10.1016/j.gca.2016.07.031	AeOM	13CH3D	NA	NA	1	0.0007	experiment 37 C
Krause et al. 2022	10.1016/j.epsl.2022.117681	AeOM	13CH3D	NA	NA	0.9981	0.0017	experiment room temperature
Krause et al. 2022	10.1016/j.epsl.2022.117681	AeOM	12CH2D2	NA	NA	0.9013	0.0045	experiment room temperature
Li et al. 2024	10.1016/j.gca.2024.06.032	AeOM	13CH3D	NA	NA	0.9968	0.0218	experiment 37 C, f ≥ 0.668
Li et al. 2024	10.1016/j.gca.2024.06.032	AeOM	13CH3D	NA	NA	0.9981	0.0047	experiment 37 C, f ≤ 0.556
Li et al. 2025	10.1016/j.gca.2024.06.032	AeOM	13CH3D	NA	NA	1.0015	0.0422	experiment 27 C, f ≥0.374
Li et al. 2026	10.1016/j.gca.2024.06.032	AeOM	13CH3D	NA	NA	0.9919	0.1048	experiment 27 C, f ≤ 0.374
Li et al. 2027	10.1016/j.gca.2024.06.032	AeOM	13CH3D	NA	NA	1.0035	0.0043	experiment 21 C
Li et al. 2028	10.1016/j.gca.2024.06.032	AeOM	13CH3D	NA	NA	1.005	0.0163	experiment No-CU, f ≤ 0.574
Li et al. 2029	10.1016/j.gca.2024.06.032	AeOM	13CH3D	NA	NA	0.9987	0.0346	experiment high Cu, f ≥ 0.743
Li et al. 2030	10.1016/j.gca.2024.06.032	AeOM	12CH2D2	NA	NA	0.8877	0.0474	experiment 37 C, f ≥ 0.668
Li et al. 2031	10.1016/j.gca.2024.06.032	AeOM	12CH2D2	NA	NA	0.9539	0.0101	experiment 37 C, f ≤ 0.556
Li et al. 2032	10.1016/j.gca.2024.06.032	AeOM	12CH2D2	NA	NA	0.9528	0.0878	experiment 27 C, f ≥0.374
Li et al. 2033	10.1016/j.gca.2024.06.032	AeOM	12CH2D2	NA	NA	0.7595	0.2334	experiment 27 C, f ≤ 0.374
Li et al. 2034	10.1016/j.gca.2024.06.032	AeOM	12CH2D2	NA	NA	0.9745	0.0091	experiment 21 C
Li et al. 2035	10.1016/j.gca.2024.06.032	AeOM	12CH2D2	NA	NA	0.9464	0.0349	experiment No-CU, f ≤ 0.574
Li et al. 2036	10.1016/j.gca.2024.06.032	AeOM	12CH2D2	NA	NA	0.9069	0.0744	experiment high Cu, f ≥ 0.743

## Sheet: S3- S6 Sources Statistics
Table S3 Statistical information on the results from field samples for the merged Δ18 and Δ13CH3D for simplified database subcategories															Table S5 Statistical information on the results from lab experiments for the merged Δ18 and Δ13CH3D for group type
simplified subcategory	min	max	mean	median	n	SNAP	IPCC 2006								group type	min	max	mean	median	n
biomass burning	1.63	2.69	2.16	2.16	2	11	3C1								abiotic methanogenesis	-0.18	5.8	1.95294	1.7	17
coal seam gas	2.16	5.87	3.776	3.59	35	5	1B2								AeOM methanotrophy	-11.993	3.08	-0.514372	0.053	43
cold seep	3.32	8.16	5.42759	5.2	29	NA	NA								AOM methanotrophy	-1.87	19.477	4.34121	3.362	81
dairy cow	0.76	1.66	1.3225	1.435	4	10	3A1								catalytic equilibration	-5.84	44.22	3.317	0.6	96
groundwater	0.12	6.49	4.08979	4.39	43	NA	NA								microbial methanogenesis	-15.96	3.99	-1.54434	-1.28	143
hydrothermal vent	0.95	3	1.69091	1.665	22	NA	NA								mixing experiment	0.351	2.903	1.68082	1.79	11
lake	-0.48	9.6	3.35092	3.22	91	11	3B4								photochemical oxidation	-13.24	0.14	-2.43077	-0.555	26
marine	1.63	15.688	4.9527	4.6	122	NA	NA								pyrogenic methanogenesis	-1.51	2.09	0.663506	0.71	77
mud volcano	1.55	12.55	4.47753	4.2195	58	NA	NA								sediment incubation	-2.41	5.62	0.553478	0.54	23
natural gas	0.3	10.22	3.3554	2.97	381	5	1B2
oil field	2.9	5.66	3.975	3.705	14	5	1B2
rice paddies	-1.8	-1.02	-1.35667	-1.25	3	10	3C7
spring	-3.36	4.17	0.948	1.935	10	NA	NA
unknown	-1.28	5.24	1.83883	1.765	128	NA	NA
volcano	0.82	1.77	1.25273	1.22	22	NA	NA
wetlands	-2.16	1.08	-0.488571	-0.31	14	11	3B4
Table S4 Statistical information on the results from field samples for Δ12CH2D2 for simplified database subcategories															Table S6 Statistical information on the results from lab experiments for Δ12CH2D2 for group type
simplified subcategory	min	max	mean	median	n	SNAP	IPCC 2006								group type	min	max	mean	median	n
biomass burning	-18.12	-14.49	-16.305	-16.305	2	11	3C1								abiotic methanogenesis	-55.86	1.41	-16.2929	-9.2	17
coal seam gas	4.25	20.05	10.1975	10.22	32	5	1B2								AeOM methanotrophy	-37.74	20.224	-3.23026	-2.734	43
groundwater	-24.502	21.61	6.64446	12.84	24	NA	NA								AOM methanotrophy	4.923	65.08	15.3951	7.514	40
hydrothermal vent	1.7	14.5	7.825	7.6	12	NA	NA								catalytic equilibration	-0.06	23.5	7.91673	5.598	33
lake	-37.76	8.547	-20.9702	-21.76	13	11	3B4								microbial methanogenesis	-95.99	98.67	-22.3741	-17.14	66
marine	-16.6	74.626	13.5029	11.7	58	NA	NA								mixing experiment	0.412	9.078	6.54645	7.364	11
mud volcano	0.49	42.639	12.0898	12.7295	46	NA	NA								pyrogenic methanogenesis	-41.7	-0.24	-17.0569	-16.91	29
natural gas	-23.13	19.15	3.78742	5.485	114	5	1B2								sediment incubation	-51.79	-30.87	-39.5274	-36.72	19
oil field	0.01	12.46	6.13	5.03	13	5	1B2
rice paddies	-43.17	-31.11	-36.0367	-33.83	3	10	3C7
spring	-20.3	15.8	-7.9925	-13.735	4	NA	NA
unknown	-34.45	53.6	30.0124	42.61	119	NA	NA
volcano	-0.01	0.2	0.095	0.095	2	NA	NA
wetlands	-57.16	-31.02	-45.61	-43.835	10	11	3B4
